# Supplementary material for: Low dose naltrexone: Effects on medication in rheumatoid and seropositive arthritis. A nationwide register-based controlled quasi-experimental before-after study
Source: PubMed Central journal article supplement (PMC6375629; doi:10.1371/journal.pone.0212460), 2019-02-14
Supplement: pone.0212460.s001.pdf [file pone.0212460.s001.pdf]

**S1 Table: Average cumulative dose (DDD) of drugs classified as Other DMARDs, dispensed to patients with rheumatoid and seropositive arthritis one year before and after the first dispense of LDN.**

|                         | LDN exposure | Dispensed drugs (DDD) |       | Difference (DDD) |                 |       |
|-------------------------|--------------|-----------------------|-------|------------------|-----------------|-------|
|                         |              | Before                | After | Mean             | 95% CI          | p     |
| <b>All other DMARDs</b> | LDN x 1      | 159.0                 | 173.1 | 14.1             | (-26.8 to 55.1) | 0.500 |
|                         | LDN x 2-3    | 149.1                 | 201.2 | 52.1             | (4.3 to 99.9)   | 0.036 |
|                         | LDN x 4+     | 148.1                 | 135.1 | -13.0            | (-37.5 to 11.4) | 0.297 |
| <b>Antimalarials</b>    | LDN x 1      | 49.5                  | 49.5  | 0.0              | (-13.5 to 13.5) | 1.000 |
|                         | LDN x 2-3    | 51.2                  | 65.3  | 14.1             | (-3.5 to 31.8)  | 0.120 |
|                         | LDN x 4+     | 43.9                  | 40.6  | -3.3             | (-15.6 to 8.9)  | 0.594 |
| <b>Methotrexate</b>     | LDN x 1      | 93.2                  | 98.8  | 5.6              | (-19.2 to 30.4) | 0.657 |
|                         | LDN x 2-3    | 94.2                  | 121.9 | 27.7             | (-0.7 to 56)    | 0.059 |
|                         | LDN x 4+     | 84.8                  | 75.5  | -9.3             | (-22.1 to 3.6)  | 0.158 |
| <b>Aminosalicylates</b> | LDN x 1      | 13.0                  | 14.3  | 1.4              | (-2.6 to 5.4)   | 0.505 |
|                         | LDN x 2-3    | 3.0                   | 3.3   | 0.3              | (-0.8 to 1.5)   | 0.567 |
|                         | LDN x 4+     | 12.8                  | 12.9  | 0.1              | (-7.2 to 7.4)   | 0.973 |
| <b>Leflunomide</b>      | LDN x 1      | 3.3                   | 10.5  | 7.1              | (-3.7 to 18)    | 0.198 |
|                         | LDN x 2-3    | 0.7                   | 10.7  | 10.0             | (-2.2 to 22.2)  | 0.112 |
|                         | LDN x 4+     | 6.7                   | 6.1   | -0.6             | (-3.4 to 2.3)   | 0.707 |

LDN, low dose naltrexone. DDD, defined daily dose. DMARD, disease modifying antirheumatic drug. Three groups based on number of LDN dispenses: LDN ×1 (*N* = 164) collected LDN once, LDN ×2–3 (*N* = 115) two or three times and LDN ×4+ (*N* = 224) four or more times. There were no users of anakinra, azathioprine, ciclosporine, mercaptopurine, rituximab, tacrolimus, and tocilizumab neither before nor after starting LDN
