# Supplementary material for: Low dose naltrexone: Effects on medication in rheumatoid and seropositive arthritis. A nationwide register-based controlled quasi-experimental before-after study
Source: PubMed Central journal article supplement (PMC6375629; doi:10.1371/journal.pone.0212460), 2019-02-14
Supplement: pone.0212460.s002.pdf [file pone.0212460.s002.pdf]

**S2 Table: Number of users of drugs classified as Other DMARDs among patients with rheumatoid and seropositive arthritis one year before and after the first dispense of LDN.**

|                         | LDN exposure | Number of users |        |       |        | Difference |                 |       |
|-------------------------|--------------|-----------------|--------|-------|--------|------------|-----------------|-------|
|                         |              | Before          | %      | After | %      | % points   | 95% CI          | p     |
| <b>Any other DMARDs</b> | LDN x 1      | 42              | (40.0) | 39    | (37.1) | -2.9       | (-10.5 to 4.8)  | 0.306 |
|                         | LDN x 2-3    | 29              | (38.7) | 31    | (41.3) | 2.7        | (-5.6 to 10.9)  | 0.326 |
|                         | LDN x 4+     | 57              | (31.7) | 45    | (25.0) | -6.7       | (-10.3 to -3.0) | 0.001 |
| <b>Antimalarials</b>    | LDN x 1      | 23              | (21.9) | 23    | (21.9) | 0.0        | (-5.3 to 5.3)   | 0.399 |
|                         | LDN x 2-3    | 21              | (28.0) | 18    | (24.0) | -4.0       | (-9.8 to 1.8)   | 0.159 |
|                         | LDN x 4+     | 29              | (16.1) | 23    | (12.8) | -3.3       | (-6.7 to 0.1)   | 0.064 |
| <b>Methotrexate</b>     | LDN x 1      | 39              | (37.1) | 36    | (34.3) | -2.9       | (-10.1 to 4.4)  | 0.295 |
|                         | LDN x 2-3    | 29              | (38.7) | 30    | (40.0) | 1.3        | (-6.5 to 9.2)   | 0.377 |
|                         | LDN x 4+     | 48              | (26.7) | 39    | (21.7) | -5.0       | (-8.2 to -1.8)  | 0.003 |
| <b>Aminosalicylates</b> | LDN x 1      | 6               | (5.7)  | 5     | (4.8)  | -1.0       | (-4.2 to 2.3)   | 0.338 |
|                         | LDN x 2-3    | 2               | (2.7)  | 3     | (4.0)  | 1.3        | (-3.2 to 5.8)   | 0.337 |
|                         | LDN x 4+     | 10              | (5.6)  | 7     | (3.9)  | -1.7       | (-4.1 to 0.8)   | 0.161 |
| <b>Leflunomide</b>      | LDN x 1      | 2               | (1.9)  | 3     | (2.9)  | 1.0        | (-2.3 to 4.2)   | 0.338 |
|                         | LDN x 2-3    | 1               | (1.3)  | 3     | (4.0)  | 2.7        | (-2.5 to 7.9)   | 0.240 |
|                         | LDN x 4+     | 4               | (2.2)  | 5     | (2.8)  | 0.6        | (-0.5 to 1.6)   | 0.241 |

LDN, low dose naltrexone. DMARD, disease modifying antirheumatic drug. Three groups based on number of LDN dispenses: LDN x1 ( $N = 105$ ) collected LDN once, LDN x2-3 ( $N = 75$ ) two or three times and LDN x4+ ( $N = 180$ ) four or more times. There were no users of anakinra, azathioprine, ciclosporin, mercaptopurine, rituximab, tacrolimus, and tocilizumab neither before nor after starting LDN.
