# Supplementary material for: Low dose naltrexone: Effects on medication in rheumatoid and seropositive arthritis. A nationwide register-based controlled quasi-experimental before-after study
Source: PubMed Central journal article supplement (PMC6375629; doi:10.1371/journal.pone.0212460), 2019-02-14
Supplement: pone.0212460.s003.pdf [file pone.0212460.s003.pdf]

**S3 Table: Odds of being a user of examined drugs one year before and one year after starting LDN, by LDN exposure.**

|                                             |                       | Odds being a user <b>before</b> starting LDN |                |          | Odds being a user <b>after</b> starting LDN |                |          |
|---------------------------------------------|-----------------------|----------------------------------------------|----------------|----------|---------------------------------------------|----------------|----------|
|                                             |                       | <b>OR</b>                                    | <b>95% CI</b>  | <b>P</b> | <b>OR</b>                                   | <b>95% CI</b>  | <b>P</b> |
| <b>Any examined drug</b>                    | LDN x 2-3 vs LDN x 1  | 0.13                                         | (0.02 to 1.18) | 0.035    | 1.83                                        | (0.34 to 9.67) | 0.473    |
|                                             | LDN x 4+ vs LDN x 1   | 0.16                                         | (0.02 to 1.30) | 0.052    | 0.51                                        | (0.18 to 1.44) | 0.198    |
|                                             | LDN x 4+ vs LDN x 2-3 | 1.21                                         | (0.40 to 3.68) | 0.731    | 0.28                                        | (0.06 to 1.25) | 0.077    |
| <b>DMARDs</b>                               | LDN x 2-3 vs LDN x 1  | 0.71                                         | (0.38 to 1.31) | 0.272    | 0.93                                        | (0.50 to 1.72) | 0.812    |
|                                             | LDN x 4+ vs LDN x 1   | 0.55                                         | (0.33 to 0.90) | 0.017    | 0.44                                        | (0.27 to 0.72) | 0.001    |
|                                             | LDN x 4+ vs LDN x 2-3 | 0.77                                         | (0.45 to 1.33) | 0.347    | 0.47                                        | (0.27 to 0.82) | 0.007    |
| <b>NSAIDs</b>                               | LDN x 2-3 vs LDN x 1  | 1.06                                         | (0.55 to 2.02) | 0.869    | 1.12                                        | (0.61 to 2.06) | 0.717    |
|                                             | LDN x 4+ vs LDN x 1   | 0.90                                         | (0.53 to 1.51) | 0.688    | 1.15                                        | (0.70 to 1.89) | 0.576    |
|                                             | LDN x 4+ vs LDN x 2-3 | 0.85                                         | (0.47 to 1.53) | 0.590    | 1.03                                        | (0.59 to 1.80) | 0.920    |
| <b>Analgesics</b>                           | LDN x 2-3 vs LDN x 1  | 0.91                                         | (0.46 to 1.78) | 0.773    | 1.07                                        | (0.53 to 2.15) | 0.858    |
|                                             | LDN x 4+ vs LDN x 1   | 0.58                                         | (0.34 to 1.00) | 0.047    | 0.46                                        | (0.27 to 0.79) | 0.004    |
|                                             | LDN x 4+ vs LDN x 2-3 | 0.64                                         | (0.35 to 1.17) | 0.145    | 0.43                                        | (0.23 to 0.80) | 0.006    |
| <b>TNF- <math>\alpha</math> antagonists</b> | LDN x 2-3 vs LDN x 1  | 0.82                                         | (0.34 to 1.98) | 0.657    | 1.33                                        | (0.55 to 3.20) | 0.521    |
|                                             | LDN x 4+ vs LDN x 1   | 0.84                                         | (0.41 to 1.69) | 0.617    | 0.81                                        | (0.37 to 1.77) | 0.593    |
|                                             | LDN x 4+ vs LDN x 2-3 | 1.02                                         | (0.45 to 2.33) | 0.961    | 0.61                                        | (0.27 to 1.37) | 0.224    |
| <b>Systemic corticosteroids</b>             | LDN x 2-3 vs LDN x 1  | 0.49                                         | (0.27 to 0.91) | 0.022    | 0.49                                        | (0.27 to 0.91) | 0.022    |
|                                             | LDN x 4+ vs LDN x 1   | 0.52                                         | (0.32 to 0.84) | 0.008    | 0.42                                        | (0.26 to 0.69) | 0.001    |
|                                             | LDN x 4+ vs LDN x 2-3 | 1.05                                         | (0.59 to 1.86) | 0.865    | 0.86                                        | (0.48 to 1.53) | 0.600    |
| <b>Other DMARDs</b>                         | LDN x 2-3 vs LDN x 1  | 0.95                                         | (0.52 to 1.74) | 0.857    | 1.19                                        | (0.65 to 2.19) | 0.570    |
|                                             | LDN x 4+ vs LDN x 1   | 0.70                                         | (0.42 to 1.15) | 0.154    | 0.56                                        | (0.34 to 0.95) | 0.030    |
|                                             | LDN x 4+ vs LDN x 2-3 | 0.74                                         | (0.42 to 1.29) | 0.281    | 0.47                                        | (0.27 to 0.84) | 0.009    |
| <b>Opioids</b>                              | LDN x 2-3 vs LDN x 1  | 1.20                                         | (0.66 to 2.18) | 0.544    | 0.98                                        | (0.54 to 1.78) | 0.960    |
|                                             | LDN x 4+ vs LDN x 1   | 0.71                                         | (0.44 to 1.14) | 0.157    | 0.42                                        | (0.26 to 0.69) | 0.001    |
|                                             | LDN x 4+ vs LDN x 2-3 | 0.59                                         | (0.34 to 1.01) | 0.054    | 0.43                                        | (0.25 to 0.74) | 0.002    |
| <b>Other analgesics</b>                     | LDN x 2-3 vs LDN x 1  | 0.69                                         | (0.38 to 1.26) | 0.225    | 0.86                                        | (0.47 to 1.57) | 0.626    |
|                                             | LDN x 4+ vs LDN x 1   | 0.72                                         | (0.44 to 1.16) | 0.179    | 0.57                                        | (0.35 to 0.93) | 0.025    |
|                                             | LDN x 4+ vs LDN x 2-3 | 1.04                                         | (0.60 to 1.78) | 0.897    | 0.67                                        | (0.39 to 1.15) | 0.141    |

LDN, low dose naltrexone. OR: Odds Ratio. DMARD, disease modifying antirheumatic drug. NSAID, non-steroid anti-inflammatory drug. Three groups based on number of LDN dispenses: LDN x1 (N = 105) collected LDN once, LDN x2-3 (N = 75) two or three times and LDN x4+ (N = 180) four or more times. Other DMARDs include methotrexate, antimalarials, aminosaliculates and leflunomide. DMARDs is the sum of TNF- $\alpha$  antagonists, systemic corticosteroids and other DMARDs. Other analgesics include paracetamol/acetaminophen and other non-opioid analgesics.
