# Supplementary material for: Low dose naltrexone: Effects on medication in rheumatoid and seropositive arthritis. A nationwide register-based controlled quasi-experimental before-after study
Source: PubMed Central journal article supplement (PMC6375629; doi:10.1371/journal.pone.0212460), 2019-02-14
Supplement: pone.0212460.s004.pdf [file pone.0212460.s004.pdf]

**S4 Table. Odds of starting (use only after LDN), discontinuing (use only before LDN), or continuing (use before and after LDN) the examined drugs, by LDN exposure.**

|                                            |                       | Odds of <b>starting</b> drug after LDN |                 |          | Odds of <b>discontinuing</b> drug after LDN |                 |          | Odds of <b>continuing</b> drug after LDN |                |          |
|--------------------------------------------|-----------------------|----------------------------------------|-----------------|----------|---------------------------------------------|-----------------|----------|------------------------------------------|----------------|----------|
|                                            |                       | <b>OR</b>                              | <b>95% CI</b>   | <b>P</b> | <b>OR</b>                                   | <b>95% CI</b>   | <b>P</b> | <b>OR</b>                                | <b>95% CI</b>  | <b>P</b> |
| <b>Any examined drug</b>                   | LDN x 2-3 vs LDN x 1  | NA                                     | NA              | 0.017    | 0.34                                        | (0.04 to 3.12)  | 0.319    | 0.58                                     | (0.17 to 1.96) | 0.371    |
|                                            | LDN x 4+ vs LDN x 1   | NA                                     | NA              | 0.085    | 1.64                                        | (0.51 to 5.30)  | 0.401    | 0.38                                     | (0.14 to 1.04) | 0.051    |
|                                            | LDN x 4+ vs LDN x 2-3 | 0.51                                   | (0.13 to 1.94)  | 0.314    | 4.82                                        | (0.61 to 37.99) | 0.101    | 0.66                                     | (0.25 to 1.70) | 0.386    |
| <b>DMARDs</b>                              | LDN x 2-3 vs LDN x 1  | 1.27                                   | (0.47 to 3.47)  | 0.636    | 0.54                                        | (0.16 to 1.78)  | 0.301    | 0.86                                     | (0.47 to 1.56) | 0.612    |
|                                            | LDN x 4+ vs LDN x 1   | 0.50                                   | (0.19 to 1.33)  | 0.156    | 1.19                                        | (0.53 to 2.64)  | 0.674    | 0.52                                     | (0.32 to 0.85) | 0.009    |
|                                            | LDN x 4+ vs LDN x 2-3 | 0.39                                   | (0.14 to 1.08)  | 0.062    | 2.22                                        | (0.73 to 6.73)  | 0.150    | 0.61                                     | (0.36 to 1.05) | 0.074    |
| <b>NSAIDs</b>                              | LDN x 2-3 vs LDN x 1  | 1.18                                   | (0.35 to 4.01)  | 0.793    | 0.96                                        | (0.42 to 2.20)  | 0.916    | 1.07                                     | (0.59 to 1.95) | 0.820    |
|                                            | LDN x 4+ vs LDN x 1   | 1.50                                   | (0.56 to 3.99)  | 0.414    | 0.77                                        | (0.39 to 1.55)  | 0.470    | 1.03                                     | (0.63 to 1.67) | 0.907    |
|                                            | LDN x 4+ vs LDN x 2-3 | 1.27                                   | (0.45 to 3.64)  | 0.652    | 0.81                                        | (0.37 to 1.77)  | 0.596    | 0.96                                     | (0.56 to 1.65) | 0.884    |
| <b>Analgesics</b>                          | LDN x 2-3 vs LDN x 1  | 2.84                                   | (1.00 to 8.05)  | 0.043    | 2.39                                        | (0.75 to 7.61)  | 0.131    | 0.70                                     | (0.38 to 1.32) | 0.271    |
|                                            | LDN x 4+ vs LDN x 1   | 1.07                                   | (0.39 to 2.99)  | 0.891    | 2.36                                        | (0.85 to 6.52)  | 0.089    | 0.48                                     | (0.29 to 0.80) | 0.004    |
|                                            | LDN x 4+ vs LDN x 2-3 | 0.38                                   | (0.16 to 0.92)  | 0.027    | 0.99                                        | (0.41 to 2.37)  | 0.979    | 0.68                                     | (0.39 to 1.18) | 0.171    |
| <b>TNF-<math>\alpha</math> antagonists</b> | LDN x 2-3 vs LDN x 1  | 2.15                                   | (0.35 to 13.17) | 0.399    | 0.27                                        | (0.03 to 2.36)  | 0.206    | 1.13                                     | (0.43 to 3.03) | 0.801    |
|                                            | LDN x 4+ vs LDN x 1   | 0.00                                   | NA              | 0.063    | 0.57                                        | (0.16 to 2.02)  | 0.380    | 0.99                                     | (0.44 to 2.25) | 0.982    |
|                                            | LDN x 4+ vs LDN x 2-3 | 0.00                                   | NA              | 0.007    | 2.11                                        | (0.24 to 18.41) | 0.488    | 0.87                                     | (0.36 to 2.12) | 0.765    |
| <b>Systemic corticosteroids</b>            | LDN x 2-3 vs LDN x 1  | 1.06                                   | (0.42 to 2.65)  | 0.906    | 1.06                                        | (0.42 to 2.65)  | 0.906    | 0.42                                     | (0.22 to 0.83) | 0.012    |
|                                            | LDN x 4+ vs LDN x 1   | 0.55                                   | (0.24 to 1.28)  | 0.163    | 0.97                                        | (0.45 to 2.07)  | 0.935    | 0.48                                     | (0.28 to 0.80) | 0.005    |
|                                            | LDN x 4+ vs LDN x 2-3 | 0.52                                   | (0.21 to 1.30)  | 0.158    | 0.92                                        | (0.40 to 2.12)  | 0.839    | 1.12                                     | (0.58 to 2.15) | 0.728    |
| <b>Other DMARDs</b>                        | LDN x 2-3 vs LDN x 1  | 1.22                                   | (0.39 to 3.78)  | 0.733    | 0.54                                        | (0.16 to 1.78)  | 0.301    | 1.14                                     | (0.6 to 2.15)  | 0.685    |
|                                            | LDN x 4+ vs LDN x 1   | 0.00                                   | NA              | <0.001   | 0.68                                        | (0.28 to 1.63)  | 0.383    | 0.76                                     | (0.45 to 1.3)  | 0.315    |
|                                            | LDN x 4+ vs LDN x 2-3 | 0.00                                   | NA              | <0.001   | 1.27                                        | (0.40 to 4.07)  | 0.689    | 0.67                                     | (0.37 to 1.20) | 0.174    |
| <b>Opioids</b>                             | LDN x 2-3 vs LDN x 1  | 1.27                                   | (0.47 to 3.47)  | 0.636    | 2.08                                        | (0.79 to 5.46)  | 0.129    | 0.90                                     | (0.50 to 1.65) | 0.741    |
|                                            | LDN x 4+ vs LDN x 1   | 1.11                                   | (0.48 to 2.59)  | 0.805    | 3.14                                        | (1.40 to 7.03)  | 0.004    | 0.37                                     | (0.22 to 0.62) | <0.001   |
|                                            | LDN x 4+ vs LDN x 2-3 | 0.87                                   | (0.36 to 2.12)  | 0.765    | 1.51                                        | (0.72 to 3.14)  | 0.273    | 0.41                                     | (0.23 to 0.72) | 0.002    |
| <b>Other analgesics</b>                    | LDN x 2-3 vs LDN x 1  | 2.67                                   | (1.00 to 7.14)  | 0.045    | 2.43                                        | (0.56 to 10.49) | 0.221    | 0.59                                     | (0.33 to 1.08) | 0.087    |
|                                            | LDN x 4+ vs LDN x 1   | 0.91                                   | (0.34 to 2.43)  | 0.852    | 2.87                                        | (0.80 to 10.22) | 0.091    | 0.59                                     | (0.36 to 0.96) | 0.031    |
|                                            | LDN x 4+ vs LDN x 2-3 | 0.34                                   | (0.14 to 0.81)  | 0.012    | 1.18                                        | (0.41 to 3.40)  | 0.758    | 0.99                                     | (0.57 to 1.71) | 0.974    |

LDN, low dose naltrexone. OR: Odds Ratio. DMARD, disease modifying antirheumatic drug. NSAID, non-steroid anti-inflammatory drug. Three groups based on number of LDN dispenses: LDN x1 (N = 105) collected LDN once, LDN x2-3 (N = 75) two or three times and LDN x4+ (N = 180) four or more times. Other DMARDs include methotrexate, antimalarials, aminosalicylates and leflunomide. DMARDs is the sum of TNF- $\alpha$  antagonists, systemic corticosteroids and other DMARDs. Other analgesics include paracetamol/acetaminophen and other non-opioid analgesics. NA, not possible to calculate per definition.
